# Supplementary material for: A novel route to synthesize Bi/β-Bi 2 O 3 @carbon: mechanism and performance for efficient degradation of organic pollutants
Source: Royal Society of Chemistry journal article supplement (doi:10.1039/d4en00973h), 2024-12-19
Supplement: d4en00973h1.pdf [file d4en00973h1.pdf]

## Supplemental Information

### **A novel route to synthesize Bi/ $\beta$ -Bi<sub>2</sub>O<sub>3</sub>@Carbon: Mechanism and performance for efficient degradation of organic pollutants**

Xia Zhang, Yifang Zhang, Xitong Yang, Jiaxin Han, Guifen Zhu · Jing Fan\*

*School of Environment, Henan Key Laboratory for Environmental Pollution Control, Key Laboratory for Yellow River and Huai River Water Environment and Pollution Control, Ministry of Education, Henan Normal University, Xinxiang, Henan 453007, PR China*

\*Corresponding author: Tel.: +86-373-3325719

*E-mail address: [fanjing@htu.cn](mailto:fanjing@htu.cn) (J. Fan)*

**Table S1**

Table S1 Content of elements determined by elemental analysis and ICP-MS.

| Material | C (wt.%) <sup>a</sup> | Bi (wt.%) <sup>b</sup> | O (wt.%) <sup>a</sup> |
|----------|-----------------------|------------------------|-----------------------|
| CAU-17   | 21.3                  | 59.2                   | 19.5                  |
| BBC-100  | 17.2                  | 82.3                   | 0.5                   |
| BBC-200  | 17.1                  | 82.3                   | 0.6                   |
| BBC-300  | 15.9                  | 83.0                   | 1.1                   |
| BBC-400  | 13.2                  | 83.4                   | 3.4                   |
| BBC-500  |                       | 89.5                   | 10.5                  |
| BBC-600  |                       | 89.7                   | 10.3                  |

a, determined by elemental analysis; b, determined by ICP-MS.

**Fig.S1-S4**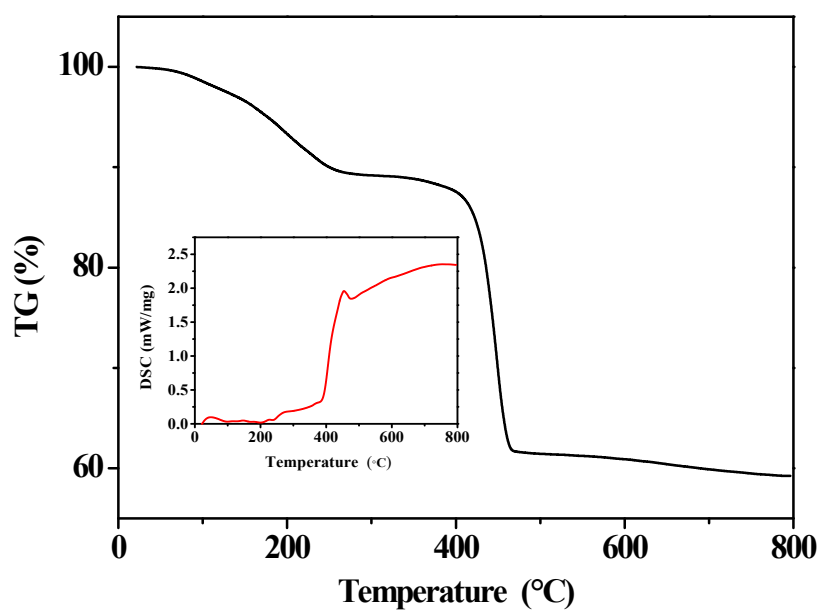**Fig. S1.** Thermogravimetric curve of CAU-17.

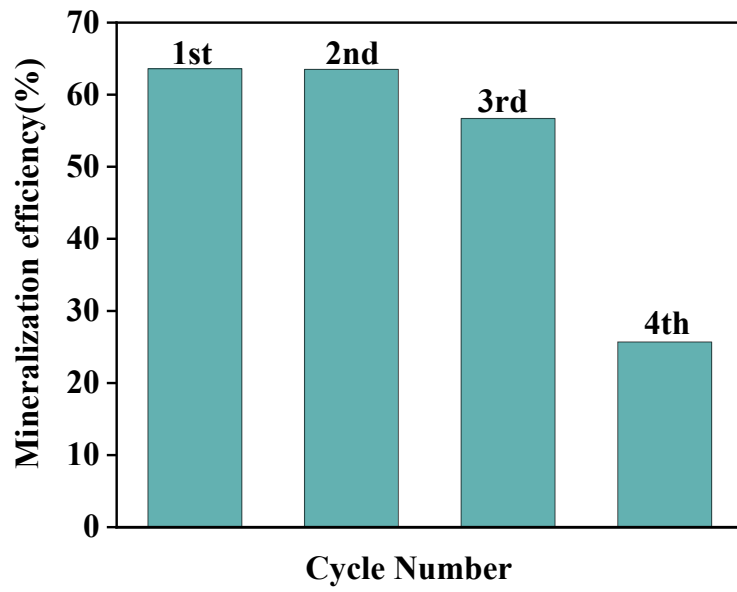

Fig.S2. Mineralization efficiency of FWA351 during recycling.

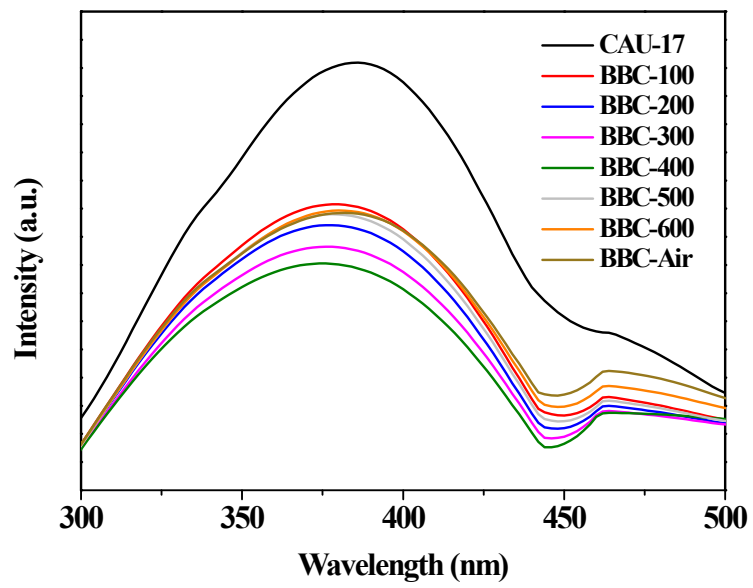

Fig. S3. Photoluminescence diagram of the samples.

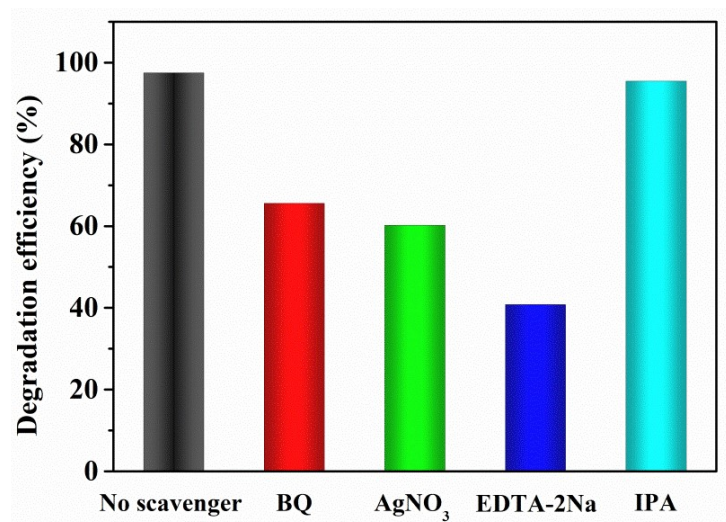

Fig. S4. Degradation of FWA 351 by BBC-400 in the presence of different scavengers.
